# Supplementary material for: Comparing performance of modern genotype imputation methods in different ethnicities
Source: PubMed Central journal article supplement (PMC5048136; doi:10.1038/srep34386), 2016-10-04
Supplement: srep34386-s1.pdf [file srep34386-s1.pdf]

## Comparing performance of modern genotype imputation methods in different ethnicities

Nab Raj Roshyara<sup>1,2</sup>, Katrin Horn<sup>1</sup>, Holger Kirsten<sup>1,2,3</sup>, Peter Ahnert<sup>1,2</sup> and Markus Scholz<sup>1,2</sup>

1. Institute for Medical Informatics, Statistics and Epidemiology, University of Leipzig, Haertelstrasse 16-18, 04107 Leipzig, Germany
2. LIFE Center (Leipzig Interdisciplinary Research Cluster of Genetic Factors, Phenotypes and Environment), University of Leipzig, Philipp-Rosenthal Strasse 27, 04103 Leipzig, Germany
3. Department for Cell Therapy, Fraunhofer Institute for Cell Therapy and Immunology, Perlickstraße 1, 04103 Leipzig

### Commands used for genotype imputation

*MaCH commands for imputation of popres data set with HapMap 3 reference*

Step1:

```
./mach1 -p target_data.ped -d target_data.dat -s hapmap3_ref.snps -h hapmap3_ref.hap.gz --greedy  
-r 30 --prefix target_data_output_step1
```

Step2:

```
./mach1 -p target_data.ped -d target_data.dat -s hapmap3_ref.snps -h hapmap3_ref.hap.gz  
--crossover target_data_output_step1.rec --errormap target_data_output_step1.rec --greedy  
--geno --quality --dosage --probs --phase --mle --mldetails --prefix target_data_output_step2
```

*MaCH commands for imputation of LIFE A1 data set with 1000Genomes phase 1 rel. 3 reference*

Step1:

```
./mach1 -p target_data.ped -d target_data.dat --vcfReference -h  
chr22.phase1_release_v3.20101123.snps_indels_svs.genotypes.refpanel.EUR.vcf.gz --startposition  
25553359 --endposition 35553359 --greedy --compact -r 30 --prefix target_data_output_step1
```

Step2:

```
./mach1 -p target_data.ped -d target_data.dat --vcfReference -h  
chr22.phase1_release_v3.20101123.snps_indels_svs.genotypes.refpanel.EUR.vcf.gz --crossover  
target_data_output_step1.rec --errormap target_data_output_step1.erate --startposition 25553359  
--endposition 35553359 --greedy --geno --quality --dosage --probs --phase --mle --mldetails --prefix  
target_data_output_step2
```

*MaCH-Minimac commands for imputation of popres data set with HapMap 3 reference*

Step1:

```
./mach1 -p target_data.ped -d target_data.dat --rounds 20 --states 200 --phase --interim 5 --sample 5  
--prefix target_output_step1
```

Step2:

```
./minimac --refSnps hapmap3_ref.snps --refHaps hapmap3_ref.hap --snps snplist_name.txt  
--haps target_output_step1.hap.gz --round 20 --states 200 --phased --probs --gzip --em  
--prefix target_output_step2
```

*MaCH-Minimac commands for imputation of LIFE A1 data set with 1000Genomes phase 1 rel. 3 reference*

Step1:

```
./mach1 -p target_data.ped -d target_data.dat --rounds 20 --states 200 --phase --interim 5  
--prefix target_output_step1
```

Step2:

```
./minimac2 --haps target_output_step1.hap.gz --snps snplist_name.txt --vcfReference --refHaps  
chr22.phase1_release_v3.20101123.snps_indels_svs.genotypes.refpanel.EUR.vcf.gz --round 20  
--states 200 --em --phased --probs --gzip --prefix target_output_step2
```

*MaCH-Admix commands for imputation of popres data set with HapMap 3 reference*

```
./mach-admix -p target_data.ped -d target_data.dat -s reference_data.snp -h reference_data.hap  
--geno --probs --dosage --phase --prefix output_data
```

*MaCH-Admix commands for imputation of LIFE A1 data set with 1000Genomes phase 1 rel. 3 reference*

```
./mach-admix -p target_data.ped -d target_data.dat --vcfReference -h  
chr22.phase1_release_v3.20101123.snps_indels_svs.genotypes.refpanel.ALL.vcf.gz  
--startposition 25553359 --endposition 35553359 --geno --probs --dosage --phase  
--prefix output_data
```

*IMPUTE2 commands*

```
./impute2 -m reference_genetic_map.txt -h reference.hap.gz -l reference.legend -g target_data.gens  
--strand_g target_data.strand -pgs -int lowerBound upperBound -Ne 20000 -o target_output_name
```

## *SHAPEIT-IMPUTE2 commands*

Step1:

```
./shapeit --input-gen target_data.gens target_data.sample --input-map reference_genetic_map.txt  
--output-max output_data.haps output_data.sample --output-log output_data.log
```

Step2:

```
./impute2 -use_prephased_g -known_haps_g output_data.haps -m reference_genetic_map.txt  
-h reference.hap.gz -l reference.legend -strand_g target_data.strand -iter 50 -burnin 20 -phase  
-int lowerBound upperBound -Ne 20000 -o target_output_name
```

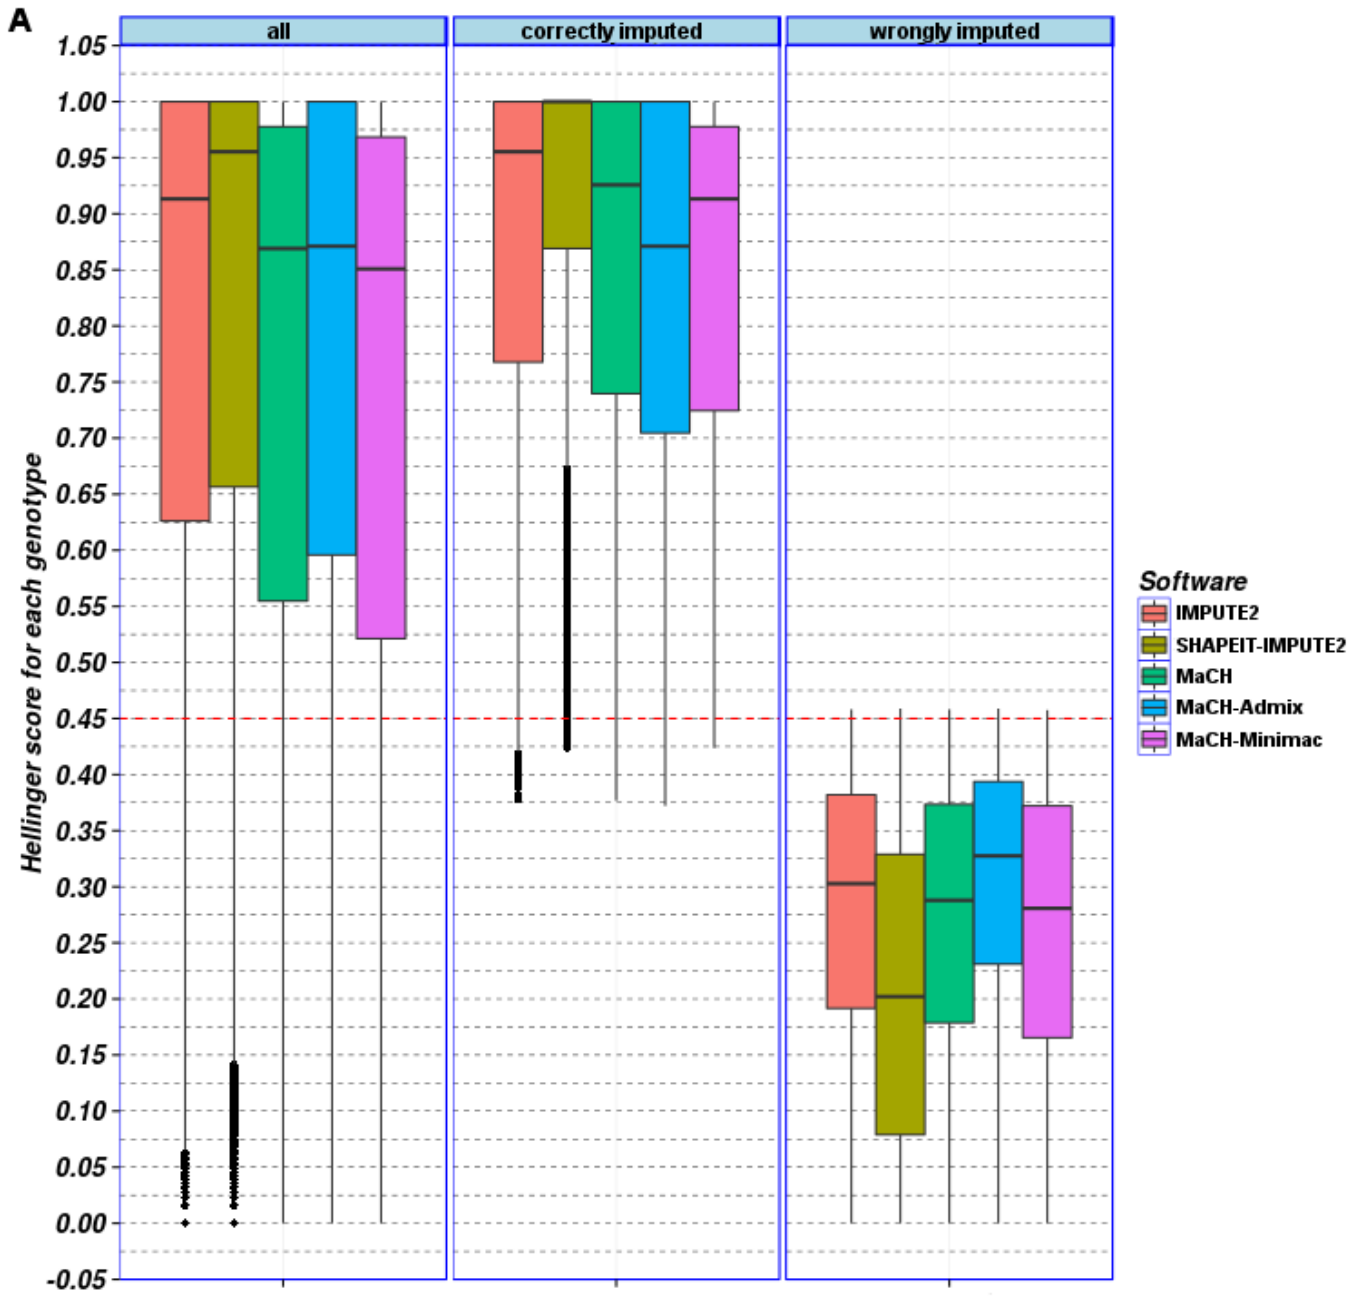

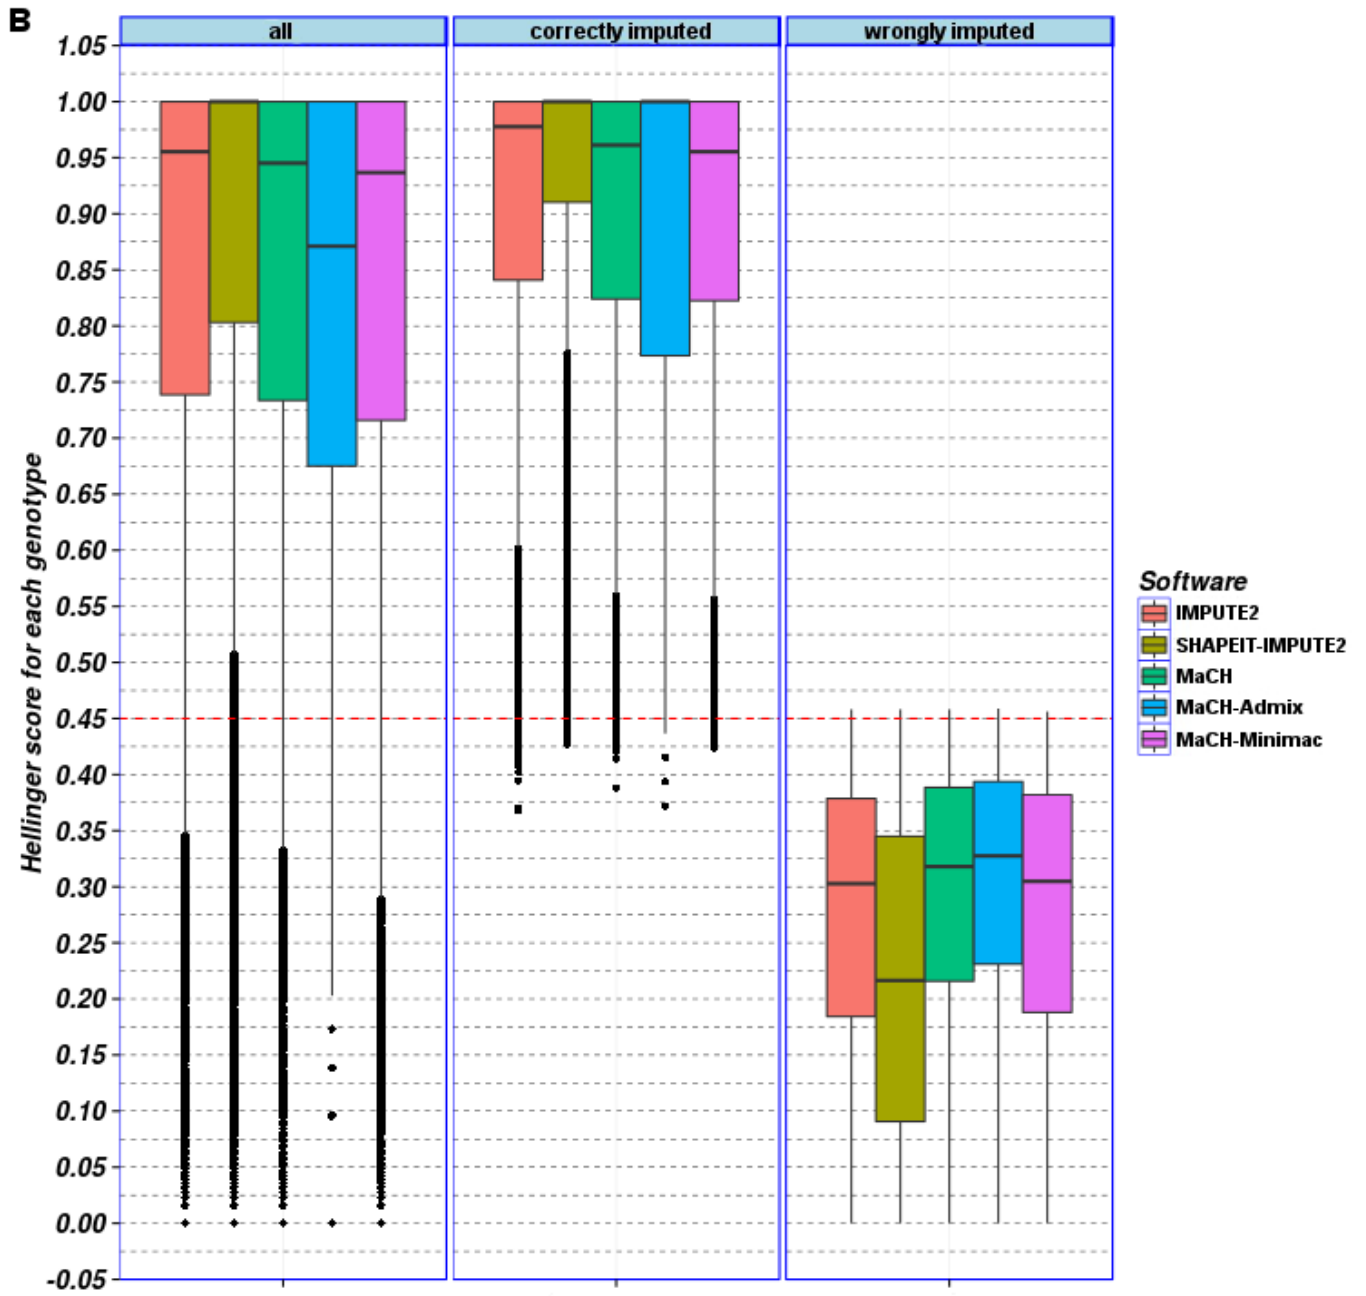

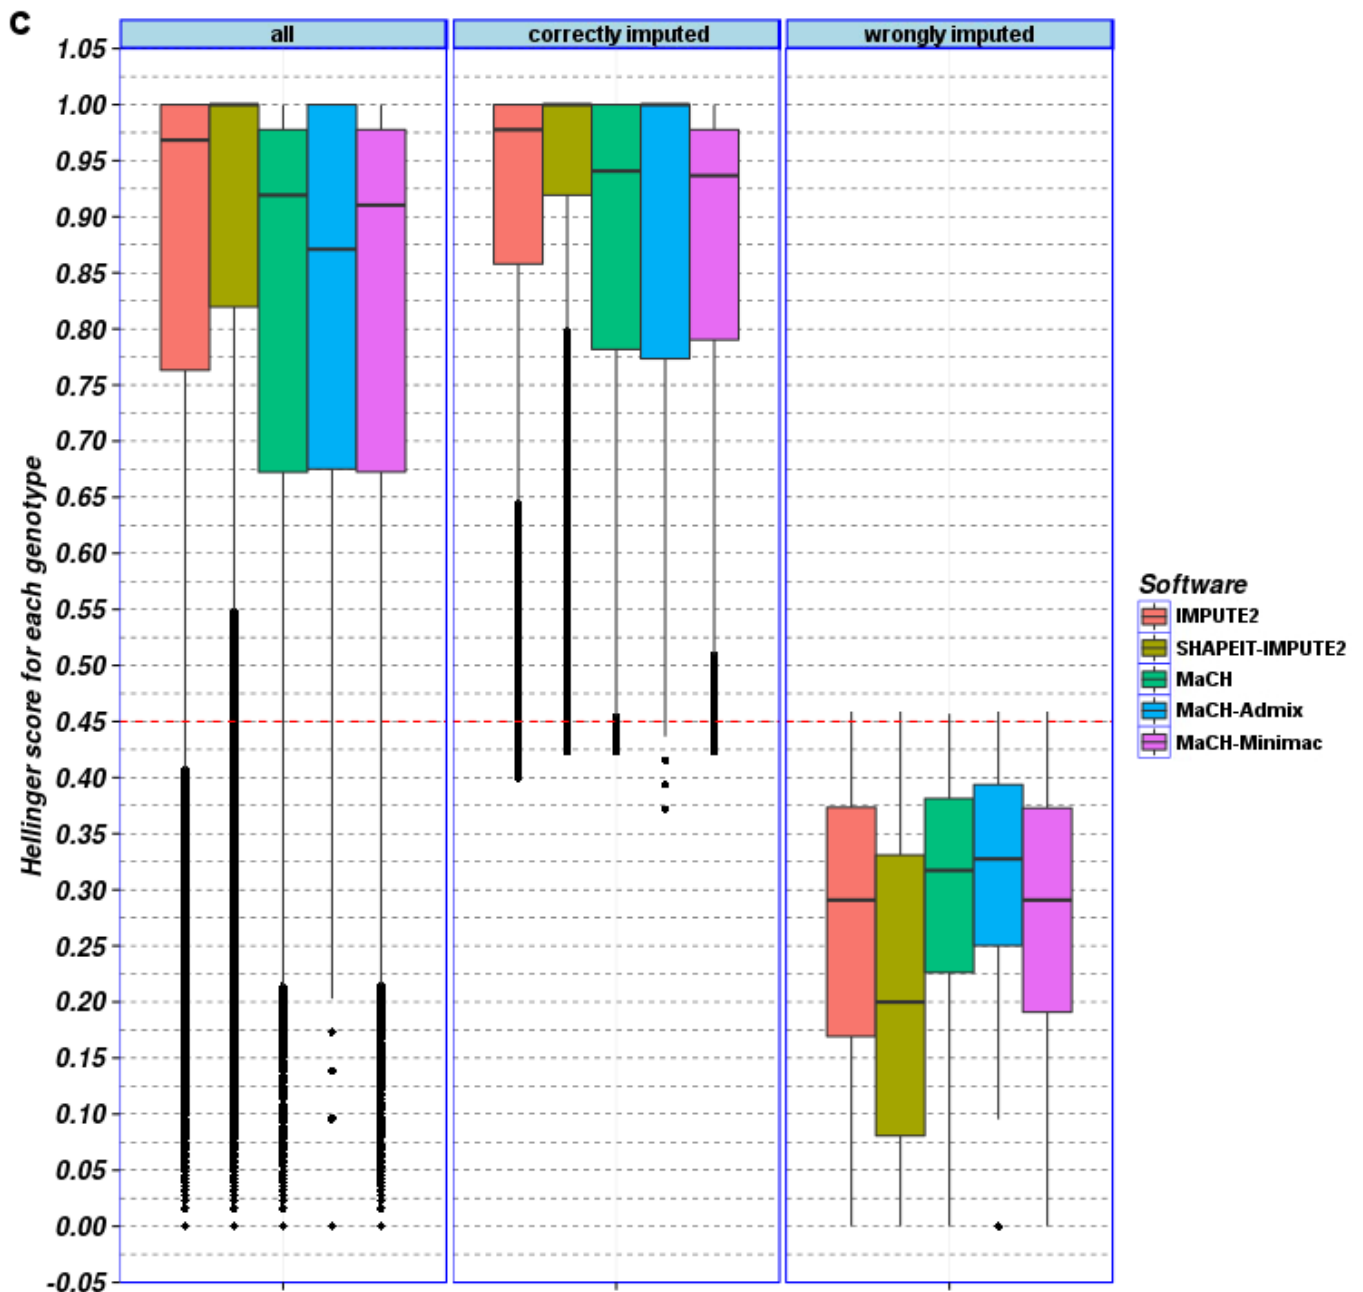

Supplementary figure S1: Boxplots of Hellinger scores of genotypes imputed with five different frameworks. We present results for all imputed genotypes, and separately, for cases where best guess genotypes match true genotypes (correctly imputed) or not (wrongly imputed). A: AfAm, B: Germany, C: Japan POPRES population. As one can see, a Hellinger score  $\geq 0.45$  almost ensures that the best-guess genotype equals the true genotype. The figures look very similar for the different POPRES populations considered.

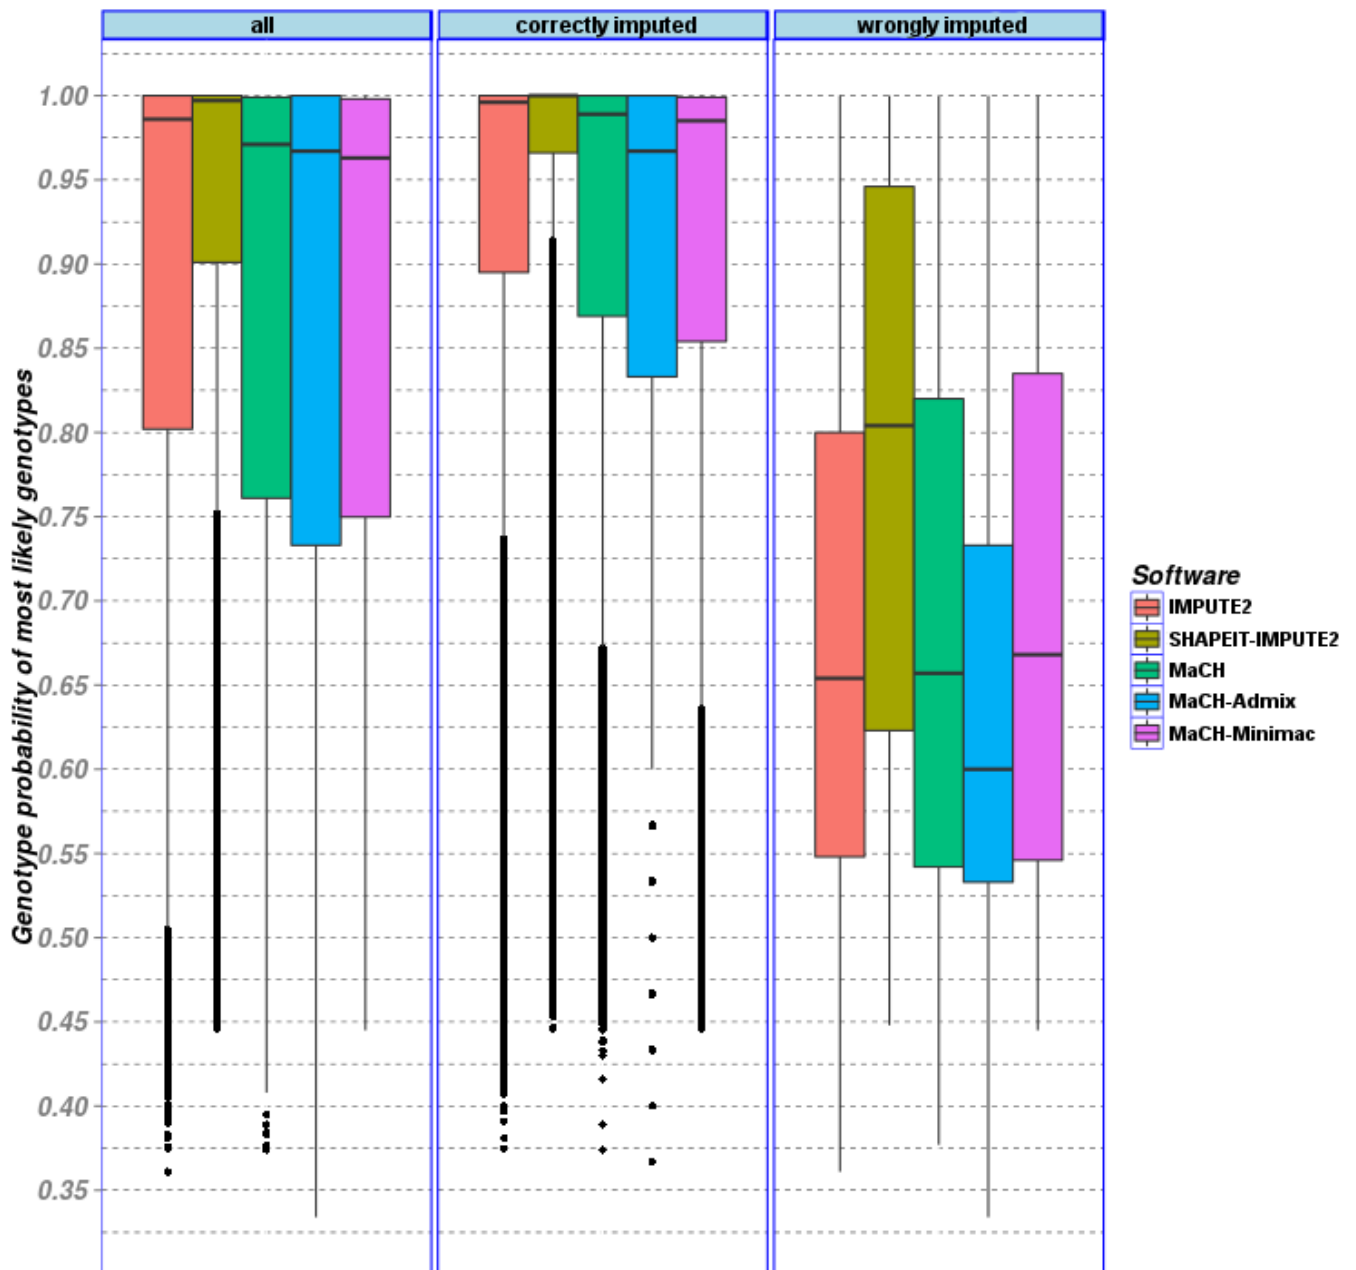

Supplementary figure S2: Boxplots of posterior probabilities of best guess genotypes in AfAm population. All imputation tools were applied with default parameters and reference panels. SHAPEIT-IMPUTE2 shows exceptionally high posterior probabilities for wrongly imputed SNPs.

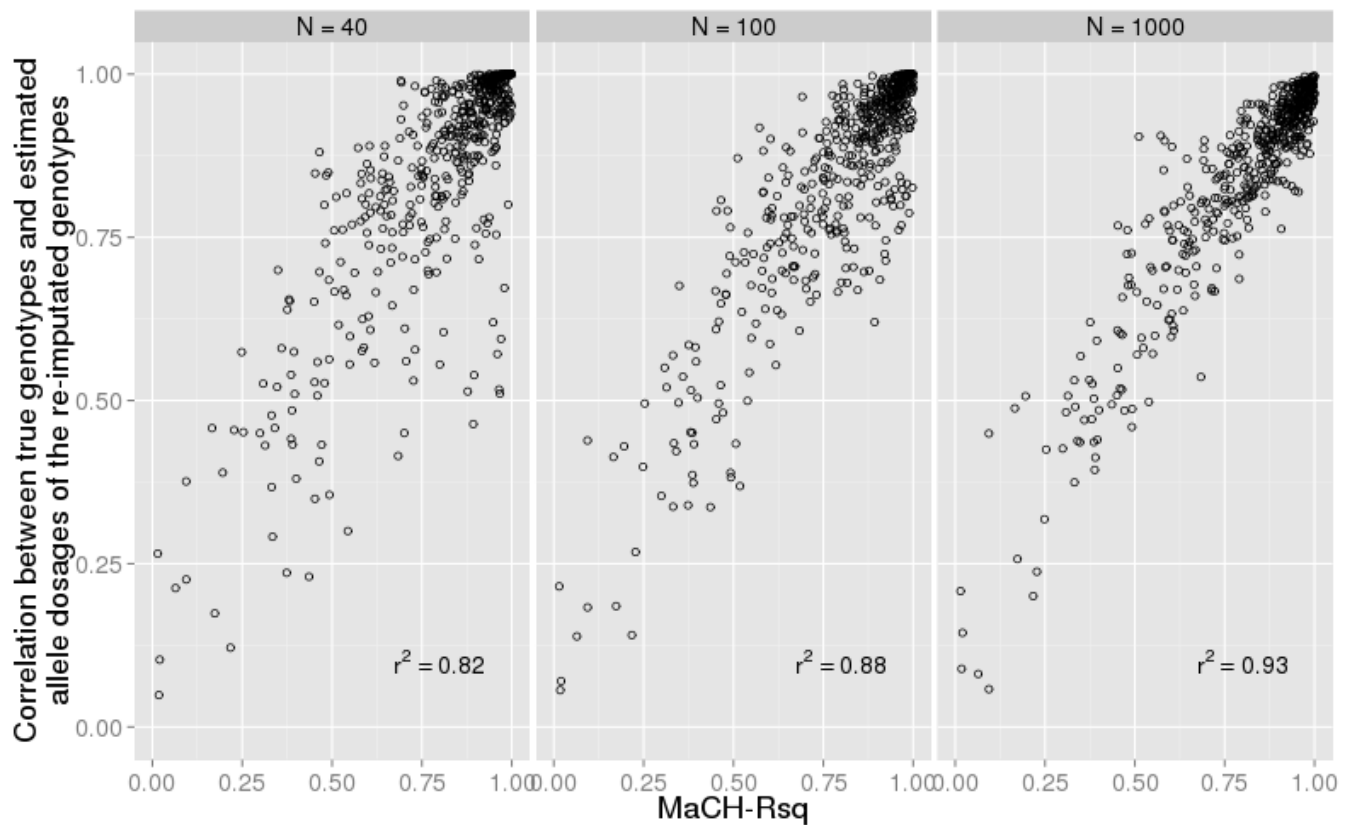

**Supplementary figure S3: Comparison of two measures of imputation accuracy for the LIFE-Adult data. Each point represents an imputed HQ-SNP. Analysis was performed in dependence on case numbers of LIFE subsets (N=40, 100, 1000 respectively). As one can see, the two measures are in strong agreement becoming even stronger for larger sample sizes.**



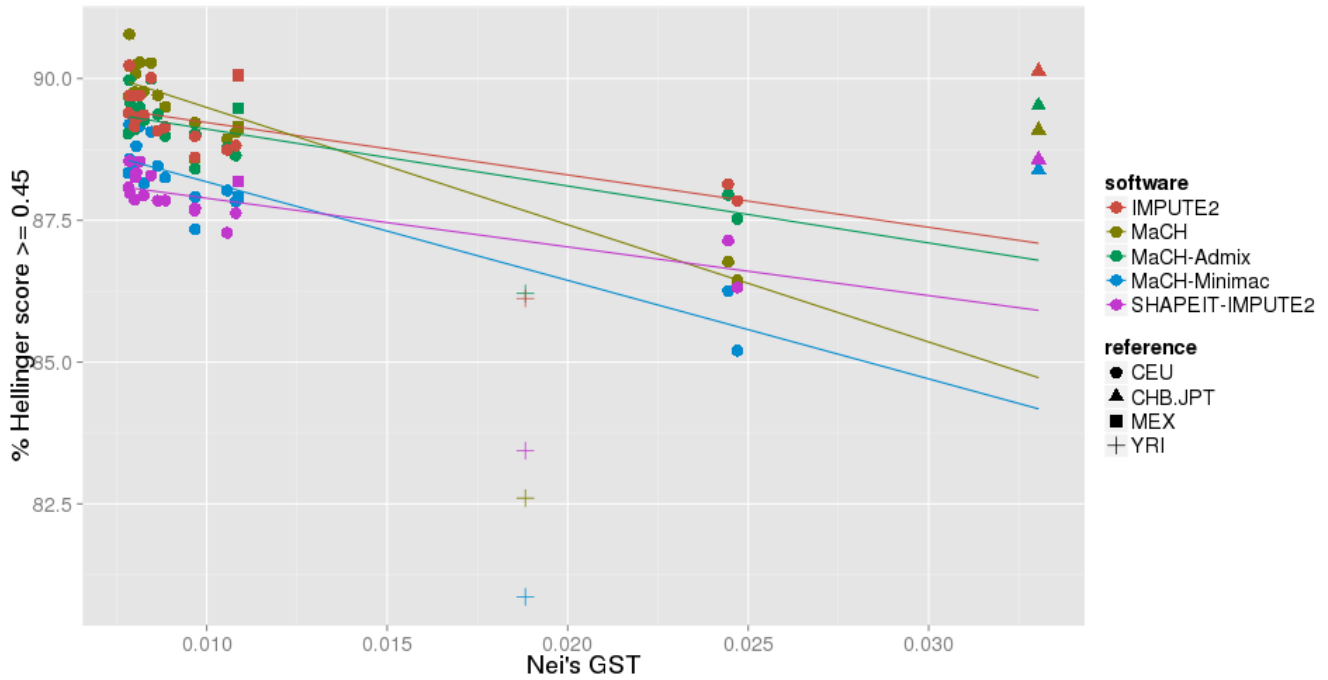

**Supplementary Figure S4: Relation between Nei's  $G_{ST}$  and imputation accuracy. Symbols correspond to imputation results of POPRES populations. There is a general trend towards lower imputation accuracy for larger distance to the best matching reference. The trend is observed for all imputation frameworks considered. POPRES AfAm population (crosses) results in particularly low imputation quality due to the higher number of polymorphic sites and the weaker linkage structure. POPRES Japanese population (triangles) shows the opposite behavior.**

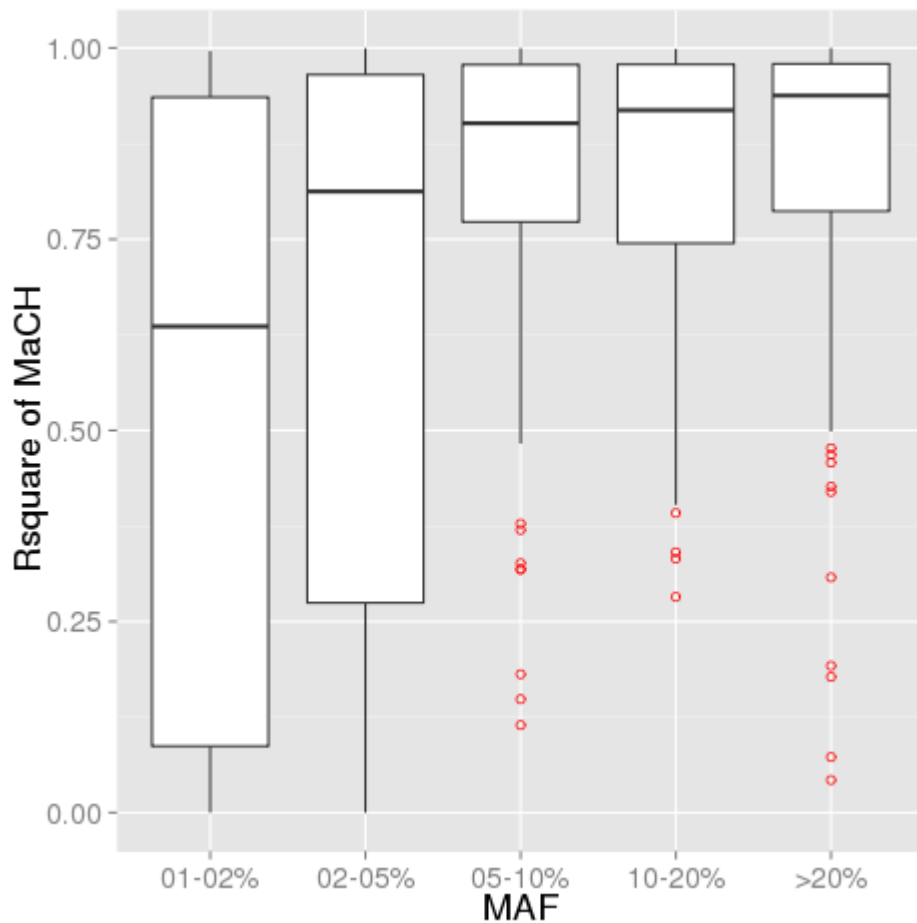

**Supplementary Figure S5: Impact of MAF on imputation quality analysed in a subset of N=40 LIFE-Adult samples. SNPs with MAF<5% are particularly prone to inferior imputation quality. Performances of higher frequent variants are comparable.**

| Country         | MaCH and MaCH-Minimac framework<br>(Best-matched Reference Panel) |                             |               |                    | Mixed Reference Panel |               |                       |
|-----------------|-------------------------------------------------------------------|-----------------------------|---------------|--------------------|-----------------------|---------------|-----------------------|
|                 | Reference Panel                                                   | Nei's G <sub>ST</sub> Score | MaCH Score    | MaCH_Minimac Score | MaCH-Admix Score      | IMPUTE2 Score | SHAPEIT-IMPUTE2 Score |
| Australian      | CEU                                                               | 0.0078287                   | <b>88.916</b> | 87.691*            | 88.18*                | 88.471*       | 87.329*               |
| British         | CEU                                                               | 0.0078541                   | <b>89.962</b> | 88.503*            | 89.095*               | 89.392*       | 87.697*               |
| Canadian        | CEU                                                               | 0.0078631                   | <b>89.472</b> | 88.067*            | 88.632*               | 88.879*       | 87.173*               |
| Swiss.French    | CEU                                                               | 0.0079978                   | <b>89.027</b> | 88.001*            | 88.237*               | 88.264*       | 87.179*               |
| French          | CEU                                                               | 0.0080226                   | <b>89.351</b> | 87.553*            | 88.244*               | 88.376*       | 87.521*               |
| German          | CEU                                                               | 0.0080485                   | <b>89.484</b> | 88.169*            | 88.667*               | 88.684*       | 87.423*               |
| Irish           | CEU                                                               | 0.0081449                   | <b>89.474</b> | 88.255*            | 88.771*               | 88.788*       | 87.767*               |
| Swiss           | CEU                                                               | 0.0082549                   | <b>89.100</b> | 87.515*            | 88.316*               | 88.65*        | 87.137*               |
| Belgians        | CEU                                                               | 0.0084603                   | <b>89.354</b> | 88.143*            | 88.935*               | 89.078        | 87.763*               |
| Swiss.German    | CEU                                                               | 0.0086417                   | <b>88.813</b> | 87.415*            | 88.402*               | 88.106*       | 86.966*               |
| eastEU          | CEU                                                               | 0.0088483                   | <b>88.656</b> | 87.462*            | 88.114*               | 88.349        | 87.111*               |
| Portuguese      | CEU                                                               | 0.0096742                   | <b>87.642</b> | 86.627*            | 87.554                | 87.554        | 86.879*               |
| Spanish         | CEU                                                               | 0.0096786                   | 88.337        | 87.01*             | <b>88.409</b>         | 88.079        | 87.097*               |
| Italian         | CEU                                                               | 0.0105699                   | <b>87.822</b> | 87.017*            | 87.822                | 87.652        | 86.513*               |
| From Yugoslavia | CEU                                                               | 0.0108079                   | <b>88.276</b> | 87.015*            | 87.76*                | 87.623*       | 86.702*               |
| Mexican         | MEX                                                               | 0.0108799                   | 88.347*       | 87.501*            | 88.775*               | <b>89.192</b> | 87.348*               |
| AfAm            | YRI                                                               | 0.0188273                   | 81.655*       | 79.961*            | <b>85.197</b>         | 85.092        | 82.526*               |
| Punjabi         | CEU                                                               | 0.0244462                   | 85.873*       | 85.67*             | <b>87.271</b>         | 87.194        | 86.295*               |
| Indian          | CEU                                                               | 0.0247062                   | 85.783*       | 84.714*            | <b>87.105</b>         | 87.044        | 85.663*               |
| Japanese        | CHB.JPT                                                           | 0.0330444                   | 88.525*       | 87.978*            | 88.558*               | <b>89.368</b> | 87.822*               |

**Supplementary Table S1: Comparison of percentages of genotypes with good SEN scores ( $\geq 0.95$ ) obtained for 20 different POPRES samples with either MaCH, MaCH-Minimac, MaCH-Admix, IMPUTE2, or SHAPEIT-IMPUTE2. For Imputation with MaCH and MaCH-Minimac framework, the best matched reference panel based on Nei's  $G_{ST}$  was used. Nei's  $G_{ST}$  values and corresponding reference panels are also presented. Imputation frameworks with best results are marked with bold italic letters for each population. Scenarios significantly inferior to the best one are marked with an asterisk. McNemar's test was applied for this purpose.**

| Country         | MaCH and MaCH-Minimac framework<br>(Best-matched Reference Panel) |                             |               |                    | Mixed Reference Panel |               |                       |
|-----------------|-------------------------------------------------------------------|-----------------------------|---------------|--------------------|-----------------------|---------------|-----------------------|
|                 | Reference Panel                                                   | Nei's G <sub>ST</sub> Score | MaCH Score    | MaCH-Minimac Score | MaCH-Admix Score      | IMPUTE2 Score | SHAPEIT-IMPUTE2 Score |
| Australian      | CEU                                                               | 0.0078287                   | <b>90.579</b> | 89.273*            | 89.876*               | 89.882*       | 88.197*               |
| British         | CEU                                                               | 0.0078541                   | <b>91.536</b> | 90.001*            | 90.862*               | 90.697*       | 88.58*                |
| Canadian        | CEU                                                               | 0.0078631                   | <b>91.019</b> | 89.4*              | 90.777                | 90.251*       | 88.073*               |
| Swiss.French    | CEU                                                               | 0.0079978                   | <b>90.513</b> | 89.279*            | 89.882*               | 89.498*       | 88.067*               |
| French          | CEU                                                               | 0.0080226                   | <b>91.012</b> | 89.291*            | 90.206*               | 89.718*       | 88.359*               |
| German          | CEU                                                               | 0.0080485                   | <b>91.002</b> | 89.714*            | 90.53*                | 89.999*       | 88.377*               |
| Irish           | CEU                                                               | 0.0081449                   | <b>91.071</b> | 89.957*            | 90.588*               | 90.176*       | 88.656*               |
| Swiss           | CEU                                                               | 0.0082549                   | <b>90.613</b> | 88.979*            | 90.213                | 89.851*       | 88.069*               |
| Belgians        | CEU                                                               | 0.0084603                   | 90.978        | 89.794*            | <b>90.983</b>         | 90.416*       | 88.44*                |
| Swiss.German    | CEU                                                               | 0.0086417                   | <b>90.430</b> | 89.131*            | 90.216                | 89.498*       | 88.018*               |
| eastEU          | CEU                                                               | 0.0088483                   | <b>90.185</b> | 89.106*            | 90.010                | 89.5*         | 87.927*               |
| Portuguese      | CEU                                                               | 0.0096742                   | 89.255        | 88.262*            | <b>89.430</b>         | 89.008*       | 87.889*               |
| Spanish         | CEU                                                               | 0.0096786                   | 89.983        | 88.754*            | <b>90.213</b>         | 89.5*         | 87.865*               |
| Italian         | CEU                                                               | 0.0105699                   | 89.734        | 88.841*            | <b>89.783</b>         | 89.235*       | 87.449*               |
| From Yugoslavia | CEU                                                               | 0.0108079                   | <b>89.713</b> | 88.578*            | 89.685                | 89.186*       | 87.673*               |
| Mexican         | MEX                                                               | 0.0108799                   | 89.763*       | 88.808*            | 90.433                | <b>90.454</b> | 88.248*               |
| AfAm            | YRI                                                               | 0.0188273                   | 83.535*       | 81.901*            | <b>87.231</b>         | 86.677*       | 83.574*               |
| Punjabi         | CEU                                                               | 0.0244462                   | 87.6*         | 87.107*            | <b>89.146</b>         | 88.669*       | 87.288*               |
| Indian          | CEU                                                               | 0.0247062                   | 87.247*       | 86.244*            | <b>88.629</b>         | 88.415*       | 86.501*               |
| Japanese        | CHB.JPT                                                           | 0.0330444                   | 90.183        | 89.401*            | 90.501                | <b>90.529</b> | 88.659*               |

**Supplementary Table S2: Counts (in percentage) of most likely genotypes which are well-matched with the original genotypes as obtained for 20 different POPRES samples with either MaCH, MaCH-Minimac, MaCH-Admix, IMPUTE2, or SHAPEIT-IMPUTE2. For Imputation with MaCH and MaCH-Minimac framework, the best matched reference panel based on Nei's  $G_{ST}$  was used. Nei's  $G_{ST}$  values and corresponding reference panels are also presented. Imputation frameworks with best results are marked with bold italic letter for each population. Scenarios significantly inferior to the best one are marked with an asterisk. McNemar's test was applied for this purpose.**

| Country         | MaCH and MaCH-Minimac framework<br>(Best-matched Reference Panel) |                             |            |                    | Mixed Reference Panel |               |                       |
|-----------------|-------------------------------------------------------------------|-----------------------------|------------|--------------------|-----------------------|---------------|-----------------------|
|                 | Reference Panel                                                   | Nei's G <sub>ST</sub> Score | MaCH Score | MaCH-Minimac Score | MaCH-Admix Score      | IMPUTE2 Score | SHAPEIT-IMPUTE2 Score |
| Australian      | CEU                                                               | 0.0078287                   | 0.808*     | <b>0.815</b>       | 0.767*                | 0.829*        | <b>0.878</b>          |
| British         | CEU                                                               | 0.0078541                   | 0.814*     | <b>0.817</b>       | 0.773*                | 0.834*        | <b>0.879</b>          |
| Canadian        | CEU                                                               | 0.0078631                   | 0.811*     | <b>0.817</b>       | 0.768*                | 0.832*        | <b>0.879</b>          |
| Swiss.French    | CEU                                                               | 0.0079978                   | 0.809*     | <b>0.819</b>       | 0.772*                | 0.834*        | <b>0.880</b>          |
| French          | CEU                                                               | 0.0080226                   | 0.812*     | <b>0.816</b>       | 0.773*                | 0.834*        | <b>0.880</b>          |
| German          | CEU                                                               | 0.0080485                   | 0.812*     | <b>0.820</b>       | 0.771*                | 0.833*        | <b>0.878</b>          |
| Irish           | CEU                                                               | 0.0081449                   | 0.813*     | <b>0.819</b>       | 0.769*                | 0.835*        | <b>0.879</b>          |
| Swiss           | CEU                                                               | 0.0082549                   | 0.811*     | <b>0.813</b>       | 0.77*                 | 0.834*        | <b>0.879</b>          |
| Belgians        | CEU                                                               | 0.0084603                   | 0.813*     | <b>0.815</b>       | 0.774*                | 0.835*        | <b>0.878</b>          |
| Swiss.German    | CEU                                                               | 0.0086417                   | 0.809*     | <b>0.814</b>       | 0.769*                | 0.831*        | <b>0.878</b>          |
| eastEU          | CEU                                                               | 0.0088483                   | 0.806*     | <b>0.815</b>       | 0.766*                | 0.831*        | <b>0.877</b>          |
| Portuguese      | CEU                                                               | 0.0096742                   | 0.802*     | <b>0.808</b>       | 0.762*                | 0.825*        | <b>0.875</b>          |
| Spanish         | CEU                                                               | 0.0096786                   | 0.802*     | <b>0.811</b>       | 0.762*                | 0.825*        | <b>0.875</b>          |
| Italian         | CEU                                                               | 0.0105699                   | 0.803*     | <b>0.808</b>       | 0.762*                | 0.821*        | <b>0.872</b>          |
| From Yugoslavia | CEU                                                               | 0.0108079                   | 0.806*     | <b>0.813</b>       | 0.765*                | 0.829*        | <b>0.879</b>          |
| Mexican         | MEX                                                               | 0.0108799                   | 0.797*     | <b>0.799</b>       | 0.77*                 | 0.838*        | <b>0.879</b>          |
| AfAm            | YRI                                                               | 0.0188273                   | 0.716*     | 0.712              | <b>0.719</b>          | 0.777*        | <b>0.842</b>          |
| Punjabi         | CEU                                                               | 0.0244462                   | 0.788*     | <b>0.800</b>       | 0.756*                | 0.815*        | <b>0.870</b>          |
| Indian          | CEU                                                               | 0.0247062                   | 0.789*     | <b>0.796</b>       | 0.761*                | 0.82*         | <b>0.868</b>          |
| Japanese        | CHB.JPT                                                           | 0.0330444                   | 0.759*     | <b>0.778</b>       | 0.756*                | 0.832*        | <b>0.876</b>          |

**Supplementary Table S3: Comparison of software specific R<sub>sq</sub> score and Info score as obtained for 20 different POPRES samples with either MaCH, MaCH-Minimac, MaCH-Admix, IMPUTE2, or SHAPEIT-IMPUTE2. For Imputation with MaCH and MaCH-Minimac framework, the best matched reference panel based on Nei's G<sub>ST</sub> was used. Nei's G<sub>ST</sub> values and corresponding reference panels are also presented. Imputation frameworks with best results are marked with bold italic letters for each population. Scenarios significantly inferior to the best one are marked with an asterisk. McNemar's test was applied for this purpose.**

| Country         | Genetic similarity |            | MaCH-Minimac         |                      |                      | SHAPEIT-IMPUTE2      |                      |                      |
|-----------------|--------------------|------------|----------------------|----------------------|----------------------|----------------------|----------------------|----------------------|
|                 | Reference Panel    | Nei_Gst    | 50%                  | 70%                  | 100%                 | 50%                  | 70%                  | 100%                 |
| Australian      | CEU                | 0.0078287  | <b><i>90.168</i></b> | <b><i>89.093</i></b> | <b><i>88.414</i></b> | 87.877*              | 88.502               | 88.041               |
| British         | CEU                | 0.00785414 | <b><i>90.451</i></b> | <b><i>89.51</i></b>  | <b><i>89.226</i></b> | 88.657*              | 88.733*              | 88.285*              |
| Canadian        | CEU                | 0.00786305 | <b><i>90.404</i></b> | <b><i>89.124</i></b> | <b><i>88.894</i></b> | 88.314*              | 88.084*              | 87.8*                |
| Swiss.French    | CEU                | 0.00799776 | <b><i>89.64</i></b>  | <b><i>88.809</i></b> | <b><i>88.688</i></b> | 88.185*              | 88.043*              | 88.141               |
| French          | CEU                | 0.00802259 | <b><i>89.714</i></b> | <b><i>89.244</i></b> | 88.128               | 88.303*              | 88.018*              | <b><i>88.325</i></b> |
| German          | CEU                | 0.00804851 | <b><i>90.226</i></b> | <b><i>89.341</i></b> | <b><i>88.882</i></b> | 88.368*              | 88.499*              | 88.018*              |
| Irish           | CEU                | 0.00814486 | <b><i>89.562</i></b> | <b><i>88.949</i></b> | <b><i>88.554</i></b> | 87.919*              | 87.842*              | 88.05                |
| Swiss           | CEU                | 0.00825494 | <b><i>89.819</i></b> | <b><i>88.801</i></b> | <b><i>88.32</i></b>  | 88.057*              | 87.98*               | 87.98                |
| Belgians        | CEU                | 0.00846027 | <b><i>90.086</i></b> | <b><i>89.36</i></b>  | <b><i>88.789</i></b> | 88.459*              | 88.151*              | 88.338               |
| Swiss.German    | CEU                | 0.00864172 | <b><i>89.623</i></b> | <b><i>88.496</i></b> | <b><i>87.851</i></b> | 87.305*              | 87.622*              | 87.436               |
| eastEU          | CEU                | 0.00884828 | <b><i>89.359</i></b> | <b><i>88.364</i></b> | <b><i>88.134</i></b> | 87.369*              | 87.62*               | 87.762               |
| Portuguese      | CEU                | 0.00967424 | <b><i>88.734</i></b> | <b><i>87.661</i></b> | 87.136               | 87.005*              | 87.037               | <b><i>87.18</i></b>  |
| Spanish         | CEU                | 0.00967859 | <b><i>89.08</i></b>  | <b><i>88.161</i></b> | <b><i>87.712</i></b> | 87.395*              | 87.11*               | 87.635               |
| Italian         | CEU                | 0.0105699  | <b><i>88.75</i></b>  | <b><i>87.865</i></b> | <b><i>87.996</i></b> | 87.231*              | 87.329               | 87.198*              |
| From Yugoslavia | CEU                | 0.0108079  | <b><i>89.102</i></b> | <b><i>88.303</i></b> | <b><i>88.029</i></b> | 87.624*              | 87.329*              | 87.285*              |
| Mexican         | MEX                | 0.0108799  | <b><i>89.571</i></b> | <b><i>88.99</i></b>  | <b><i>88.563</i></b> | 88.727*              | 88.782               | 88.42                |
| AfAm            | YRI                | 0.0188273  | 82.212               | 80.91*               | 80.659*              | <b><i>82.628</i></b> | <b><i>82.376</i></b> | <b><i>82.89</i></b>  |
| Punjabi         | CEU                | 0.0244462  | <b><i>87.693</i></b> | 86.938               | 86.577*              | 87.036               | <b><i>87.233</i></b> | <b><i>87.244</i></b> |
| Indian          | CEU                | 0.0247062  | <b><i>87.137</i></b> | 86.36                | 85.66*               | 86.7                 | <b><i>86.71</i></b>  | <b><i>86.7</i></b>   |
| Japanese        | CHB.JPT            | 0.0330444  | <b><i>89.583</i></b> | 88.843               | 88.977               | 89.101               | <b><i>89.078</i></b> | <b><i>89.033</i></b> |

**Supplementary Table S4: Percentage of genotypes with good SEN score ( $\geq 0.95$ ) for imputation frameworks with pre-phasing strategy. Different percentages of HQ-SNPs were masked (50%, 70%, 100%). Imputation frameworks with best results are marked with bold italic letters for each population. Scenarios significantly inferior to the best one are marked with an asterisk. McNemar's test was applied for this purpose.**
